# Supplementary material
Source: PubMed Central journal article supplement (PMC4572494)
Supplement: mmc2.pdf [file mmc2.pdf]

## Article

## Cholesterol Modulates CFTR Confinement in the Plasma Membrane of Primary Epithelial Cells

Asmahan Abu-Arish,<sup>1</sup> Elvis Pandzic,<sup>2</sup> Julie Goepp,<sup>3</sup> Elizabeth Matthes,<sup>3</sup> John W. Hanrahan,<sup>3</sup> and Paul W. Wiseman<sup>4,\*</sup>

<sup>1</sup>Physics and Physiology, <sup>2</sup>Physics, <sup>3</sup>Physiology, and <sup>4</sup>Chemistry & Physics, McGill University, Montreal, Quebec, Canada

**ABSTRACT** The cystic fibrosis transmembrane conductance regulator (CFTR) is a plasma-membrane anion channel that, when mutated, causes the disease cystic fibrosis. Although CFTR has been detected in a detergent-resistant membrane fraction prepared from airway epithelial cells, suggesting that it may partition into cholesterol-rich membrane microdomains (lipid rafts), its compartmentalization has not been demonstrated in intact cells and the influence of microdomains on CFTR lateral mobility is unknown. We used live-cell imaging, spatial image correlation spectroscopy, and k-space image correlation spectroscopy to examine the aggregation state of CFTR and its dynamics both within and outside microdomains in the plasma membrane of primary human bronchial epithelial cells. These studies were also performed during treatments that augment or deplete membrane cholesterol. We found two populations of CFTR molecules that were distinguishable based on their dynamics at the cell surface. One population showed confinement and had slow dynamics that were highly cholesterol dependent. The other, more abundant population was less confined and diffused more rapidly. Treatments that deplete the membrane of cholesterol caused the confined fraction and average number of CFTR molecules per cluster to decrease. Elevating cholesterol had the opposite effect, increasing channel aggregation and the fraction of channels displaying confinement, consistent with CFTR recruitment into cholesterol-rich microdomains with dimensions below the optical resolution limit. Viral infection caused the nanoscale microdomains to fuse into large platforms and reduced CFTR mobility. To our knowledge, these results provide the first biophysical evidence for multiple CFTR populations and have implications for regulation of their surface expression and channel function.

### INTRODUCTION

The cystic fibrosis transmembrane conductance regulator (CFTR) is a tightly regulated anion channel expressed at the apical surface of epithelial cells (1,2). Anion flux through the CFTR drives transepithelial fluid secretion and is required for efficient mucociliary clearance of inhaled bacteria and other particles from the lung (reviewed by Frizzell and Hanrahan (3)). Mutations in the *cftr* gene cause cystic fibrosis (CF), an autosomal recessive disease characterized by diminished salt and fluid secretion, accumulation of viscid mucus, and recurring cycles of airway infection by *Staphylococcus aureus*, *Pseudomonas aeruginosa*, and other pathogens. Most morbidity and mortality in CF results from chronic inflammation of the airways and the resulting gradual decline in lung function.

The CFTR associates with other proteins in a macromolecular complex, and its channel activity and surface expression are regulated by local signaling and recycling through endosomal compartments, respectively. These processes are expected to depend on the compartmentalization and lateral mobility of CFTR and its interactome, although CFTR dynamics at the cell surface are not well understood. Most studies have focused on protein-protein interactions,

but lipids may also play a role in compartmentalizing CFTR. About half of the CFTR in Calu-3, an airway epithelial cell line, is found in a detergent-resistant membrane (DRM) fraction hypothesized to include lipid rafts (4). Rafts are hypothesized nanoscale microdomains in the plasma membrane that are enriched in cholesterol and glycosphingolipids (5,6) and are thought to cluster receptors and intracellular signaling molecules including G protein coupled receptors (7), tumor necrosis factor receptor (8), and kinases, notably Src (8,9) and protein kinase C (10,11).

Activation of the tumor necrosis factor receptor and inhibition of Src kinase increases the association of these signaling molecules with lipid raft components and is accompanied by recruitment of the CFTR to the DRM fraction (8), suggesting that the CFTR may partition into microdomains during inflammation. This partitioning may be due to lipid interactions with CFTR itself or with the scaffold protein NHERF1, which links the CFTR to the actin cytoskeleton (12) and also binds to cholesterol at the plasma membrane (13). Colocalization of fluorescently labeled CFTR with the lipid raft markers cholera toxin B or caveolin-1 has also been observed during infection by *Pseudomonas aeruginosa* (14–16), and the CFTR has been proposed to bind and internalize bacteria to help clear them from the lumen and to initiate lipid-raft-dependent epithelial cytokine and chemokine release (8,14–17). The

Submitted March 9, 2015, and accepted for publication April 23, 2015.

\*Correspondence: paul.wiseman@mcgill.ca

Editor: Amitabha Chattopadhyay.

© 2015 by the Biophysical Society  
0006-3495/15/07/0085/10 \$2.00

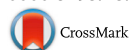

presence of a CFTR population in the DRM fraction implies heterogeneity among CFTR molecules. Only one homogeneous population of CFTR channels was detected based on single-particle tracking (18), so it remains uncertain whether some CFTR channels are present in lipid rafts under resting conditions and whether this distribution influences their lateral mobility.

In this work, we quantified the distribution of CFTR in primary human bronchial epithelial cells using spatial image correlation spectroscopy (ICS (19)) and studied CFTR dynamics using a modified version of k-space ICS (kICS (20,21)). To identify the CFTR population that is in cholesterol-rich membrane microdomains, transport and partitioning dynamics were compared under control conditions and after treatment with cholesterol oxidase or cholesterol esterase to deplete or augment cholesterol, respectively. kICS analysis revealed two dynamically distinct populations of CFTR on the plasma membrane, one of which had large (relative to the focal-spot dimensions)-spatial-scale transport dynamics indicative of CFTR mobility outside of microdomains. The other population exhibited small-spatial-scale dynamics and displayed confinement consistent with nanoscale membrane domains. Cholesterol depletion reduced CFTR confinement and the fraction of CFTR in the confined population, whereas these were both increased by cholesterol insertion. The results show a clear dependence of CFTR distribution and dynamics on cholesterol and suggest that a fraction of CFTR exists in lipid rafts under physiological conditions. Lipid-raft fusion into large platforms during infection may enhance the regulation of CFTR channel activity or modulate stability of the channel at the cell surface.

## MATERIALS AND METHODS

### Cell culture and adenovirus infection

Primary human bronchial epithelial (HBE) cells were obtained at first passage from the Cystic Fibrosis Canada Primary Airway Cell Bank at McGill University (see the [Supporting Material](#) for details). Cells were seeded on vitrogen-coated (PureCol, Advanced BioMatrix, San Diego, CA), glass-bottom FluoroDishes (World Precision Instruments, Sarasota, FL) and maintained in bronchial epithelial cell growth medium (22) at 37°C. When they reached 80% confluence, they were infected with adenovirus particles directing the expression of green-fluorescent-protein (GFP)-labeled CFTR (GFP-CFTR) (23) at a multiplicity of infection of 100 colony-forming units per cell in OptiMEM medium supplemented with 100 nM vitamin D3 (Calbiochem, Billerica, MA) for 2 days. The cells were rinsed with phosphate-buffered saline and kept in fresh OptiMEM for 2 days, then imaged in OptiMEM with 5% CO<sub>2</sub> at 37°C.

### Treatments

All treatments were performed acutely at 37°C. To reduce cholesterol and disrupt lipid rafts, cells were incubated with 1 unit/mL cholesterol oxidase (COase, Sigma, St. Louis, MO) for 30 min before and during imaging. COase was used because in preliminary experiments it was found to cause less cell damage during extended imaging periods compared to methyl- $\beta$ -

cyclodextrin (M $\beta$ CD). To increase cholesterol production and raft stability, cells were treated with 0.1 unit/mL cholesterol esterase (CEase, Sigma) for 30 min before and during imaging. To examine the acute effects of adenoviral infection on CFTR distribution and dynamics, HBE cells that had already been transduced with GFP-CFTR were exposed to GFP-CFTR adenovirus particles at a multiplicity of infection of 100 for 30 min and then imaged.

### Confocal microscopy

Live cell imaging was performed in the Advanced BioImaging Facility of the McGill Life Sciences Complex using an LSM-710 confocal microscope (Zeiss, Jena, Germany), which was equipped with a multiline argon laser (488 nm, 25 mW) and a 561 nm line laser (15 mW). Time-series images were collected from flat regions of the plasma membrane near the coverslip using 0.5% laser power to minimize fluorescence photobleaching. Under these conditions, fluorescence photobleaching was measured to be <10% of the average fluorescence intensity of the first frame of the image series. EGFP was excited using the 488 nm laser line and Alexa-594 was excited at 561 nm. Imaging was performed using a Plan-Apochromat 63 $\times$  (NA 1.40) oil immersion objective, a confocal pinhole of 1 Airy unit, and a digital gain setting of 900. The experiments were performed on subconfluent, unpolarized HBE cells expressing GFP-CFTR in a humidified cell incubator on the microscope stage maintained at 37°C with 5% CO<sub>2</sub> (Live Cell Instrument, Seoul, South Korea).

The time series consisted of 800 images (256  $\times$  256 pixels) collected from a single cell and focused on an area of membrane in contact with the glass coverslip. Image series were collected at a frame rate of 6.5 Hz, a pixel diameter of 0.06  $\mu$ m, and a pixel dwell time of 1  $\mu$ s. For the analysis of confined dynamics, 59–136 image series were analyzed per stimulation condition. For the purpose of visually showing CFTR distribution in the plasma membrane, individual confocal images of a 1024  $\times$  1024 pixel area were collected at 0.2 Hz, with a pixel diameter of 0.13  $\mu$ m, a dwell time of 6  $\mu$ s, and laser power of 5% to enhance the signal/noise ratio.

### Spatial ICS

ICS was used to measure the degree of aggregation and cluster density for CFTR in cells exposed to different stimuli. The ICS technique has been described in detail elsewhere (19). Briefly, the degree of aggregation (DA) was calculated as

$$DA = \frac{\langle i \rangle}{CD} \quad (1)$$

and the cluster density (CD) as

$$CD = \frac{\langle n_p \rangle}{\pi \omega_0^2}, \quad (2)$$

where CD is the average number of independent fluorescent entities per unit area,  $\langle i \rangle$  is the spatial average pixel intensity of the image region of interest (ROI),  $\langle n_p \rangle$  is the average number of particles per beam focus, and  $\omega_0$  is the  $e^{-2}$  beam radius.  $\langle n_p \rangle$  is the reciprocal of the zero spatial lags amplitude of the spatial correlation function of the image, which is obtained from a nonlinear least-squares fit of a Gaussian function. Details of the spatial image cross-correlation spectroscopy technique can be found elsewhere (24,25) and in the [Supporting Material](#).

### kICS: Theory and analysis

CFTR dynamics were studied using kICS analysis (20,21). Briefly, for this analysis, the k-space time correlation function,  $\Phi(\vec{k}; \tau)$ , is obtained by calculating the temporal correlation function of the k-space image series

(i.e., after calculating the two-dimensional spatial Fourier transform for each image in the time series) using

$$\Phi(\vec{k}; \tau) = \langle \tilde{i}(\vec{k}, t) \tilde{i}^*(\vec{k}, t + \tau) \rangle, \quad (3)$$

where  $\tilde{i}(\vec{k}, t)$  is the Fourier transform of the image acquired at time  $t$ , and  $\tilde{i}^*(\vec{k}, t + \tau)$  is the complex conjugate of the Fourier transform of the image acquired at time  $t + \tau$ . The angular brackets denote temporal correlation.

For particles undergoing two-dimensional diffusion with a diffusion coefficient  $D$ ,  $\Phi(\vec{k}; \tau)$  is analytically written as

$$\Phi(\vec{k}; \tau, t) = N \frac{q^2 I_0^2 \omega_0^4 \pi^2}{4} \times \langle \Theta(t) \Theta(t + \tau) \rangle \times \exp\left[-|\vec{k}|^2 \left(D\tau + \frac{\omega_0^2}{4}\right)\right], \quad (4)$$

where  $N$  is the number of fluorescent particles in the image ROI,  $q$  is the quantum yield of the fluorophore,  $I_0$  is the intensity at the center of the beam focus, and  $\omega_0$  is the  $e^{-2}$  laser-beam radius in the lateral direction at focus. Fluorophore photophysics effects (bleaching and blinking) are accounted for by the time-dependent function,  $\Theta(t)$ .

The correlation function in Eq. 4 can be simplified to

$$\Phi(\vec{k}; \tau, t) = \langle N(t) \rangle \exp\left[-|\vec{k}|^2 \left(D\tau + \frac{\omega_0^2}{4}\right)\right], \quad (5)$$

where  $\langle N(t) \rangle$  is proportional to the average number of particles in the ROI and to the time-dependent photophysics effects given in the correlation pre-factor amplitude of Eq. 4.

In the case of two different diffusing species (species 1 and 2), the correlation function is the weighted sum of all contributions, computed as

$$\Phi(\vec{k}; \tau, t) = \langle N_1 \rangle e^{-|\vec{k}|^2 \left(D_1\tau + \frac{\omega_0^2}{4}\right)} + \langle N_2 \rangle e^{-|\vec{k}|^2 \left(D_2\tau + \frac{\omega_0^2}{4}\right)}. \quad (6)$$

The finite width of the correlation function at the zero temporal lag will mask the motion at spatial scales smaller than the point spread function (PSF). In kICS, the contribution of the finite PSF can be removed by normalizing the correlation function with the zero-temporal-lag correlation function as follows:

$$\frac{\Phi(\vec{k}; \tau, t)}{\Phi(\vec{k}; 0, t)} = \phi_1 e^{-|\vec{k}|^2 D_1 \tau} + \phi_2 e^{-|\vec{k}|^2 D_2 \tau}, \quad (7)$$

where  $\phi_i$  is the amplitude of population  $i$  in the normalized multicomponent correlation function. It is proportional to  $N_i$  and is photophysics- and time dependent:

$$\phi_i = \frac{N_i}{N_i + N_j} \frac{\langle \Theta(t) \Theta(t + \tau) \rangle}{\langle \Theta^2(t) \rangle}. \quad (8)$$

This two-component model in Eq. 7 can be applied to a system with one particle type that exhibits confined (microscale) and unconfined (macro-scale) diffusion dynamics within and between small domains distributed in two dimensions if the exchange occurs on a faster timescale. A fit to this model was used to extract effective diffusion coefficients for the confined ( $D_{\text{micro}}$ ) and unconfined ( $D_{\text{macro}}$ ) particle populations and their respective amplitude parameters.

More specifically, the correlation function is fit to a sum of two Gaussians at each temporal lag  $\tau$ . The fit parameters are  $D_{\text{macro}}\tau$ ,  $D_{\text{micro}}\tau$ ,  $\phi_{\text{macro}}$ , and  $\phi_{\text{micro}}$  as a function of  $\tau$ . Mean-square displacement (MSD) plots for the

two populations are then constructed from the fit-extracted  $D_i\tau$  versus  $\tau$ , and the amplitude graphs are constructed from the fit-extracted  $\phi_i$  versus  $\tau$ .

The slope of the macro MSD versus  $\tau$  plot is  $D_{\text{macro}}$ , which is an effective diffusion coefficient of CFTR inside and between microdomains (see Fig. S4 in the Supporting Material). For the image sampling rate and membrane CFTR system in this study, the slope of the first three temporal lags of the micro MSD versus  $\tau$  plot is  $D_{\text{micro}}$ , which is the diffusion coefficient of particles confined inside the microscopic domains. The fractions that are in the macro and micro populations are then calculated from the amplitudes at long-temporal-lag values  $\tau$  as  $f_{\text{macro}} = \phi_{\text{macro}}/(\phi_{\text{macro}} + \phi_{\text{micro}})$  and  $f_{\text{micro}} = \phi_{\text{micro}}/(\phi_{\text{macro}} + \phi_{\text{micro}})$ . According to simulations (20), the recovered  $D_{\text{macro}}$  and  $D_{\text{micro}}$  are dependent on the probability of particles escaping from confinement (see the Supporting Material for details). Thus, practically, the  $D_{\text{macro}}$  describes an apparent diffusion coefficient that includes exchange in addition to simple diffusion outside of domains.

The y-axis intercept of the micro MSD plot extrapolated from long temporal lags  $\tau$  is  $R^2/4$ .  $R$  is a spatial parameter proportional to the domain radius ( $d$ ),  $D_{\text{micro}}$ , and the probability of molecules exiting the domains ( $P_{\text{out}}$ ). Based on simulations, the  $R$ -value is  $\sqrt{2}d$  for domains with radii larger than the PSF radius (20). For domains with radii smaller than the PSF radius, the  $R$ -value is twice the pixel diameter. There is a limitation for recovering the actual domain radius due to the background noise of the system and the spatial aliasing which is set by the Nyquist criterion. However, according to simulations, the  $R$ -value and domain confinement are inversely related; the smaller the  $R$ -value, the stronger the domain confinement, and the larger the  $R$ -value, the weaker the confinement (20). This makes the  $R$ -value a measure of confinement strength rather than a physical measurement of the domain radius.

For the analysis of CFTR dynamics using kICS, 59–136 image series were analyzed per stimulation condition. The mean of each measured parameter, the standard error, and the  $t$ -value were then calculated over  $n$  cells ( $n_{\text{cells}}$ , see Table 1) for statistical significance evaluations.

## Statistical analysis

The kICS measured parameters,  $D_{\text{macro}}$ ,  $D_{\text{micro}}$ ,  $f_{\text{macro}}$ ,  $f_{\text{micro}}$ , and  $R$ -value, were presented as the mean  $\pm$  SE for  $n$  cells. Data sets obtained with different treatments were compared to the control condition using the unpaired Student  $t$ -test. Differences with  $p < 0.01$  were considered statistically different.

## RESULTS

### The nature of CFTR clusters on the plasma membrane

Fig. 1 shows a typical confocal image of the plasma membrane of an unpolarized primary HBE cell expressing GFP-CFTR (henceforth called CFTR). Under control conditions (no stimulation), some CFTR was found in bright, PSF-sized fluorescent clusters that were homogeneously distributed

**TABLE 1** CFTR confinement parameters using kICS analysis

| Treatment | $D_{\text{micro}}$ ( $\mu\text{m}^2/\text{s}$ ) | $f_{\text{micro}}$           | $R$ ( $\mu\text{m}$ )          | $n_{\text{cell}}$ |
|-----------|-------------------------------------------------|------------------------------|--------------------------------|-------------------|
| Ctrl      | 0.009 $\pm$ 0.001                               | 0.27 $\pm$ 0.02              | 0.293 $\pm$ 0.007              | 136               |
| +COase    | 0.014 $\pm$ 0.001 <sup>a</sup>                  | 0.20 $\pm$ 0.01 <sup>b</sup> | 0.324 $\pm$ 0.005 <sup>a</sup> | 130               |
| +CEase    | 0.0032 $\pm$ 0.0006 <sup>a</sup>                | 0.38 $\pm$ 0.05 <sup>a</sup> | 0.224 $\pm$ 0.007 <sup>a</sup> | 60                |
| Ctrl2     | 0.008 $\pm$ 0.002                               | 0.23 $\pm$ 0.03              | 0.291 $\pm$ 0.009              | 55                |
| +Virus    | 0.0019 $\pm$ 0.0003 <sup>a</sup>                | 0.51 $\pm$ 0.05 <sup>a</sup> | 0.221 $\pm$ 0.003 <sup>a</sup> | 59                |

<sup>a</sup>Significantly different from its respective Ctrl,  $p < 0.001$ .

<sup>b</sup>Significantly different from its respective Ctrl,  $p < 0.01$ .

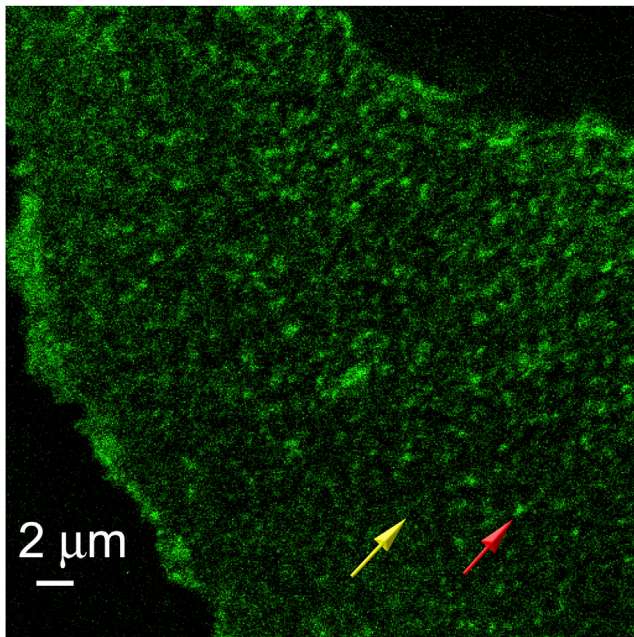

FIGURE 1 CFTR distribution on the plasma membrane of primary HBE cells. A fluorescence confocal microscope image of GFP-CFTR in the plasma membrane of a live HBE cell reveals two populations; one comprised of bright clusters that are homogeneously distributed (*arrow on right*) and another more diffuse population (*arrow on left*). To see this figure in color, go online.

over the plasma membrane (*red arrow*). Diffraction-limited imaging dictates that the actual physical size of the clusters is equal to or smaller than the PSF diameter. CFTR was also visible outside the clusters as diffuse fluorescence (*yellow arrow*) that was significantly more intense than the background autofluorescence, which was negligible under these conditions (Fig. S1). We refer to this diffuse fluorescence as the unconfined CFTR population. The clusters exhibited very slow diffusion ( $\sim 10^{-4} \mu\text{m}^2/\text{s}$ ) and occasional fission events over the course of an image series (123 s). Similar clusters have been described for both glycosylphosphatidylinositol-anchored and epidermal-growth-factor-receptor GFPs, which partition into lipid rafts (26,27).

CFTR clusters were still observed after the cells were sheared off the glass-bottom FluoroDish by sonication so that only the plasma membrane remained attached (Fig. S5; see the Supporting Material for details), suggesting they were in the plasma membrane or closely associated with it in these primary epithelial cells. To rule out the possibility that clusters were sites of clathrin-mediated endocytosis (28), we quantified the colocalization of CFTR clusters with clathrin coated pits using fluorescent transferrin and image cross-correlation spectroscopy analysis (Fig. S6; see the Supporting Material for details). The analysis revealed that only 20% of CFTR clusters were spatially colocalized with clathrin, suggesting that most clusters are unlikely to be undergoing internalization at clathrin-coated pits.

## The CFTR aggregation state is cholesterol dependent

In a previous study of Calu-3 airway epithelial cells, CFTR was detected in a DRM fraction after solubilizing airway epithelial cell lysates in ice-cold Tris-buffered saline and fractionating them on a sucrose gradient (4). To test the hypothesis that the clusters in Fig. 1 are CFTR molecules that have aggregated in lipid rafts, we studied the effects of enzyme treatments that are well known to disrupt or enhance lipid rafts in other cell types (29–31). Spatial ICS (19) was used to measure the distribution and aggregation state of CFTR in primary HBE cells (see Materials and Methods for details). COase, an enzyme that converts cholesterol into cholestenone, which does not partition to rafts, was used to disrupt the membrane microdomains (29–33). Reducing cholesterol within these domains would decrease their viscosity and make them weaker traps, which in turn would reduce the amount of CFTR within microdomains and hence its aggregation. Spatial ICS analysis (19) was applied to assess the DA and CD before and after enzyme treatment. After COase treatment, ICS analysis revealed a 30% increase in CFTR CD and a 35% decrease in DA (Fig. 2). These results indicate that stability, cell surface density, and size of CFTR clusters are cholesterol dependent, consistent with their association with membrane microdomains.

To further establish that CFTR clusters are associated with rafts, HBE cells were exposed to CEase, which catalyzes the synthesis of cholesterol and increases its concentration in the plasma membrane. ICS analysis revealed a twofold decrease in CD and a threefold increase in DA after CEase treatment (Fig. 2). The increase in DA and decrease

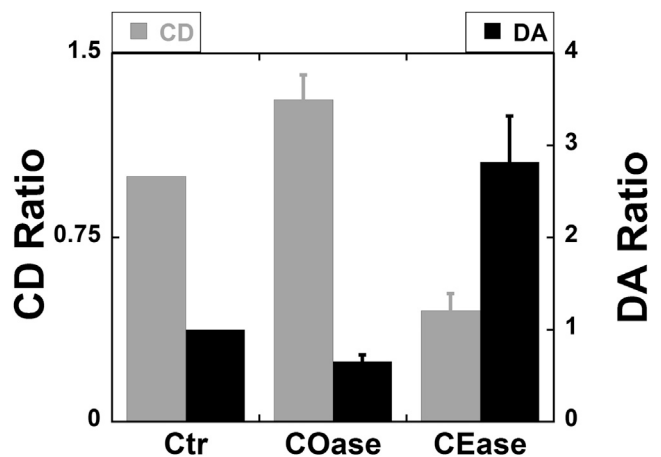

FIGURE 2 CFTR CD and DA in the plasma membrane as measured by spatial ICS are strongly cholesterol dependent. CD and DA were normalized to their control values, the CD ratio and the DA ratio, respectively. In the COase condition, cholesterol loss increased the CFTR CD by 30% and decreased the DA by 35% ( $p < 0.01$ ). Elevating cholesterol in the membrane using CEase reduced the CD by twofold and increased the DA by threefold ( $p < 0.01$ ). Error bars indicate the mean  $\pm$  SE.

in CD when cholesterol is augmented may reflect increased fusion of adjacent rafts into large confinement zones in the membrane. Regardless, the effects of manipulating cholesterol on the CFTR aggregation state strongly suggest that a population of CFTR resides within lipid rafts.

### CFTR confinement is cholesterol dependent

Confocal-laser-scanning-microscopy imaging under the different treatments shown in Fig. 3, *a–c*, highlights the dependence of CFTR clustering on cholesterol. Conditions that cause cholesterol loss from the membrane reduced the density and brightness of the clusters (Fig. 3 *b*, +COase) whereas those that elevate cholesterol increased cluster size and brightness (Fig. 3 *c*, +CEase) relative to control conditions (Fig. 3 *a*). These results link the stability and loss of CFTR clusters with the formation and disruption of lipid rafts, and they strongly suggest that CFTR clusters are associated with cholesterol-rich microdomains.

To explore this further, we investigated CFTR dynamics and confinement in the plasma membrane using an extension of the kICS technique (20,21). This analysis uses a confocal image series of GFP-CFTR to calculate the k-space time correlation function for an ROI, as shown in Fig. S2 *a*.

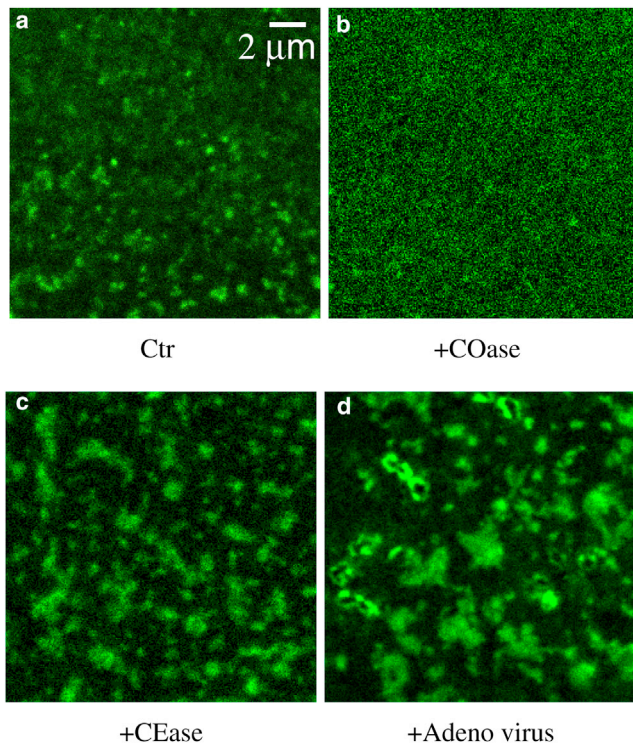

FIGURE 3 CFTR distribution in the plasma membrane depends on membrane cholesterol. (a) A confocal microscope image of GFP-CFTR in an ROI on the plasma membrane of live HBE cells under Ctr conditions. (b) After lipid raft disruption (+COase). (c) After membrane cholesterol insertion (+CEase). (d) After acute viral infection (+adenovirus). To see this figure in color, go online.

The k-space time correlation function is fitted with a two-component model that accounts for confined diffusion within a microscopic domain and macroscopic effective diffusion of CFTR (i.e., the micro and macro components, respectively). We infer that bright clusters on the plasma membrane of cells expressing GFP-CFTR (Fig. 1) represent CFTR molecules that have partitioned into lipid rafts and that display confined mobility that can be measured using kICS as  $D_{\text{micro}}$ . The diffuse background fluorescence, on the other hand, is considered to represent the CFTR population that is outside rafts and has a macroscopic diffusion coefficient proportional to  $D_{\text{macro}}$  (see Fig. S4). The distributions of these two distinct CFTR populations detected by kICS have fit amplitudes  $\phi_{\text{micro}}$  and  $\phi_{\text{macro}}$ , which are normalized to obtain the fraction of CFTR in each population,  $f_{\text{micro}}$  and  $f_{\text{macro}}$  (see Materials and Methods). kICS was used to study the effects of cholesterol reduction (+COase) and insertion (+CEase) on the macroscopic- and microscopic-scale dynamics of these CFTR populations and their respective fractions in the membrane.

### Cholesterol depletion reduces CFTR confinement

MSD plots calculated for unconfined and confined populations of CFTR ( $D_{\text{macro}}\tau$  and  $D_{\text{micro}}\tau$  versus  $\tau$ ) and the lag-time-dependent amplitude plots ( $\phi_{\text{macro}}(\tau)$  and  $\phi_{\text{micro}}(\tau)$  versus  $\tau$ ) under control (Ctr) conditions and after COase are shown in Fig. 4. The MSD plot for the unconfined population (Fig. 4 *a*) has a steeper slope after COase treatment, indicating an increase in  $D_{\text{macro}}$  (Ctr,  $D_{\text{macro}} = 0.014 \pm 0.003 \mu\text{m}^2/\text{s}$ ; COase,  $D_{\text{macro}} = 0.026 \pm 0.002 \mu\text{m}^2/\text{s}$ ). Dynamics of the confined CFTR population also increased after COase treatment, as evidenced by the steeper initial slope of the MSD curve for the micro component (the linear fit of the first three temporal lags: Ctr,  $D_{\text{micro}} = 0.009 \pm 0.001 \mu\text{m}^2/\text{s}$ , COase:  $D_{\text{micro}} = 0.014 \pm 0.001 \mu\text{m}^2/\text{s}$ ) (Fig. 4 *b*). The increase in  $D_{\text{micro}}$  indicates an increase in CFTR exchange dynamics into and out of lipid rafts after enzyme exposure. This would be explained if reducing raft cholesterol reduced their viscosity, making them weaker traps for CFTR. The amplitude of the confined CFTR population ( $\phi_{\text{micro}}$ ) declined significantly after raft disruption by COase, whereas that of the unconfined population ( $\phi_{\text{macro}}$ ) was increased (Fig. 4 *c*), demonstrating a redistribution of CFTR between the two populations. A summary of the fit parameters  $D_{\text{macro}}$ ,  $D_{\text{micro}}$ ,  $f_{\text{macro}}$ , and  $f_{\text{micro}}$  for each cell population during Ctr and COase treatment is shown in Fig. 5 and Table 1. Fig. 5 shows that ~25% of CFTR in the plasma membrane was in the confined population under the control conditions, and this fraction was reduced when rafts were disrupted by COase.

### Cholesterol insertion stabilizes CFTR within lipid rafts

Cholesterol promotes the formation of microdomains and increases their viscosity (32,33). If a population of CFTR channels partitions into rafts, augmenting cholesterol in

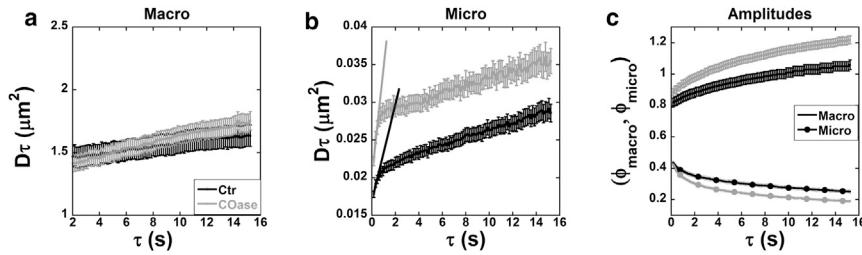

lines, as shown, yielding a slope,  $D_{\text{micro}}$ , that describes the mobility of the CFTR population inside confinements. COase treatment resulted in a larger  $D_{\text{micro}}$  compared to the Ctr condition, indicating a weaker trap. (c) The average amplitudes of the macro- ( $\phi_{\text{macro}}$ , line) and microcomponents ( $\phi_{\text{micro}}$ , solid circles) of the k-space correlation function as a function of  $\tau$ . For  $n_{\text{cell}}$  averages, see Table 1. Error bars indicate the mean  $\pm$  SE.

the raft with CEase should increase the efficiency of CFTR confinement. Fig. 5 *a* shows that diffusion coefficients for the unconfined ( $D_{\text{macro}}$ ) and confined ( $D_{\text{micro}}$ ) populations of CFTR were both reduced by CEase treatment. Moreover, the fraction of CFTR in the unconfined population ( $f_{\text{macro}}$ ) declined, whereas the confined fraction ( $f_{\text{micro}}$ ) was significantly increased (Fig. 5 *b*). The confinement parameters obtained for Ctr and CEase treatment using kICS analysis are shown in Table 1. This strongly supports the hypothesis that two populations of CFTR molecules exist in the plasma membrane, one of which is localized to lipid rafts.

### CFTR confinement strength is cholesterol dependent

The y-intercept of the micro MSD-versus- $\tau$  plot extrapolated from long temporal lags yields the  $R$ -value, which is a measure of confinement strength within lipid microdomains (see Materials and Methods for details). Simulations indicate an inverse relationship between  $R$  and confinement strength: the larger the  $R$ -value, the weaker the traps, and vice versa (20). It can be seen in Fig. S7 *a* that cholesterol depletion from the membrane (i.e., COase treatment) significantly increased the  $R$ -value, consistent with a decrease in CFTR confinement. Conversely, cholesterol insertion into the membrane (+CEase) dramatically decreased the  $R$ -value, indicating increased confinement in rafts (see Table 1). Taken together, these results indicate that membrane cholesterol is a determinant of CFTR populations through its effects on confinement. Cholesterol depletion reduces CFTR confinement strength by allowing proteins to escape

from membrane rafts, whereas cholesterol insertion increases it, probably through an increase in raft viscosity.

### CFTR confinement increases when large platforms form in response to acute viral infection

Bacteria and viruses trigger the hydrolysis of sphingomyelin in lipid rafts to ceramide, which leads to the aggregation of the rafts into large membrane platforms (34–36). Exposure to pathogens leads to ceramide synthesis and the formation of large platforms that are essential for their entry into airway epithelial cells (14,16,34,35,37). We studied the effects of acute adenoviral infection on the transformation of nanoscale lipid rafts into large platforms and on the distribution and dynamics of CFTR using kICS.

Within minutes of exposure to adenovirus particles, punctate clusters of CFTR began to coalesce into 1- to 2- $\mu$ m-diameter platforms (see Fig. 3 *d*). This was accompanied by striking decreases in  $D_{\text{macro}}$  and  $D_{\text{micro}}$  (Fig. 6 *a*) and a redistribution between the two CFTR populations (Fig. 6 *b*). The fraction displaying macroscopic dynamics ( $f_{\text{macro}}$ ) decreased, whereas the confined population ( $f_{\text{micro}}$ ) increased dramatically (Fig. 6 *b*). Viral infection also caused a dramatic reduction in the  $R$ -value (Fig. S7 *b*), confirming that recruitment into large ceramide platforms dramatically increased CFTR confinement. Table 1 summarizes the effects of acute viral infection on the confinement parameters. In summary, viral infection induces the fusion of CFTR-containing rafts into large platforms where CFTR mobility is greatly reduced, and it also leads to recruitment of CFTR from the unconfined population.

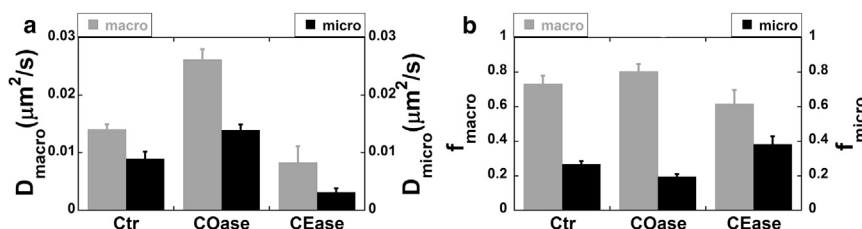

and decreased after cholesterol insertion (+CEase). Black bars indicate the confined population fraction of CFTR,  $f_{\text{micro}}$ , decreased significantly after COase and increased significantly after CEase. Error bars indicate the mean  $\pm$  SE.

FIGURE 5 CFTR macro- and microdynamics and distribution on the plasma membrane are cholesterol dependent. (a) Both  $D_{\text{macro}}$  and  $D_{\text{micro}}$  of CFTR increased significantly after cholesterol depletion from the membrane (+COase) and decreased significantly after cholesterol augmentation (+CEase). (b) Gray bars indicate the unconfined population fraction,  $f_{\text{macro}}$ , increased by cholesterol loss (+COase)

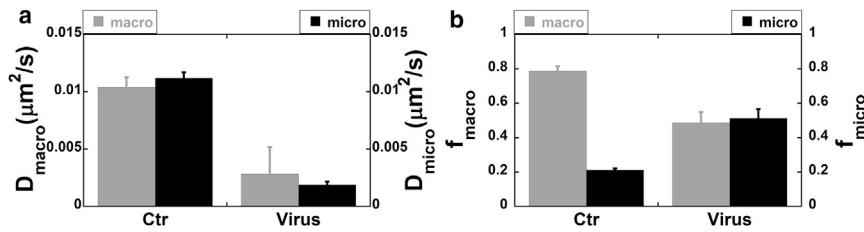

FIGURE 6 CFTR dynamics and distribution after acute viral infection. (a) Both the  $D_{\text{macro}}$  and  $D_{\text{micro}}$  of CFTR decreased significantly after the infection. (b) Although the unconfined population fraction,  $f_{\text{macro}}$ , decreased significantly postinfection (gray), the confined population fraction,  $f_{\text{micro}}$ , increased by twofold (black). This indicates recruitment of CFTR to confinement zones during infection. Error bars indicate the mean  $\pm$  SE.

## DISCUSSION

This study distinguishes two CFTR populations on the plasma membrane of primary HBE cells, one that is in clusters and another that is diffusely distributed. Quantitative analyses of image time series also revealed two populations of CFTR molecules based on lateral mobility in the membrane. One displayed confinement and slow dynamics and was sensitive to membrane cholesterol concentration. The other was more abundant, relatively unconfined, and more rapidly diffusing. The existence of two populations is consistent with biochemical data showing that  $\sim 50\%$  of the total CFTR in the airway epithelial cell line Calu-3 occurs in a cholesterol-rich DRM fraction (4,8). Therefore, a straightforward interpretation of the imaging data is that some CFTR molecules at the cell surface reside in nanoscale cholesterol- and sphingolipid-rich microdomains (lipid rafts). We quantified the distribution of CFTR between microdomains and bulk membrane on live cells and studied CFTR dynamics within each population. Finally, we examined the effects of acute viral infection quantitatively and found aggregation of preexisting CFTR clusters into large platforms similar to those described previously during infection by *Pseudomonas aeruginosa* (34) and rhinoviruses (35).

### The cell model

First-passage primary HBEs differentiate into a pseudostratified layer that is remarkably similar to airway surface epithelium *in vivo* when they are cultured at the air-liquid interface. The quantitative imaging methods used here required an area of flat membrane, so we used unpolarized cells and imaged GFP-CFTR in the plasma membrane that was in contact with the collagen-covered glass coverslip. This enabled the analysis of CFTR dynamics but also allowed mixing of apical and basolateral membrane constituents. It is not known whether identical CFTR dynamics would be observed in pure apical membrane, but platforms very similar to those induced by adenovirus in this study have been reported after infection of fully polarized cells *in vivo* (34). It is also worth noting that epithelial cell polarity is transiently lost *in vivo*, for example, during injury by the gram-positive bacterium *Staphylococcus aureus*, which usually infects CF airways before *Pseudomonas aeruginosa*. Wild-type GFP-CFTR was expressed in cells isolated from patients that were homozygous for the F508del muta-

tion, which ensured that the plasma membrane contained little, if any, endogenous nonfluorescent CFTR. A replication-deficient adenoviral vector lacking most of the viral genome was used for efficient GFP-CFTR expression. Capsid proteins on the adenovirus particles can trigger interferon and inflammatory responses in HBEs, and acute exposure did cause CFTR clusters to coalesce into large platforms. However, the innate immune response to adenovirus subsides within 1–2 days in most cell types, and the absence of platforms under control conditions 4 days posttransduction suggests that adenoviral delivery of GFP-CFTR did not have a persistent effect on CFTR dynamics.

### CFTR clustering is cholesterol dependent

GFP-CFTR clusters remained after the cells had been sheared from the coverslip, indicating that they are intimately associated with the plasma membrane (Figs. 1 and S5). This punctate distribution of GFP-CFTR was also observed in the immortalized CF cell line CFBE after adenoviral transduction or plasmid electroporation. Importantly, it was affected by changes in membrane cholesterol that affect the properties and composition of lipid rafts. Although the precise nature of the aggregates remains uncertain, only 20% were colocalized with fluorescent transferrin; therefore, most CFTR clusters were not situated in clathrin-coated pits that mediate CFTR internalization. To explore the possibility that CFTR clusters reflect confinement in cholesterol-rich lipid rafts, we used enzymes that are known to alter the amount of cholesterol in the membrane. Cholesterol depletion by COase reduced the number and brightness of CFTR clusters compared to untreated control cells (Fig. 3 b) and reduced the degree of aggregation (Fig. 2), suggesting that the formation and stability of clusters are cholesterol dependent. Conversely, augmenting membrane cholesterol using CEase increased the average size of the clusters (Fig. 3 c) and the degree of aggregation (Fig. 2), consistent with cholesterol promoting the formation of lipid rafts or their fusion into larger domains that sequester CFTR.

### Comparison of kICS and single-particle tracking for studies of CFTR confinement

Single-particle tracking (SPT) (38) has been used to examine CFTR dynamics at the cell surface (18,39). In

the first study, quantum-dot labeling after specific biotinylation of wild-type CFTR revealed very low mobility (average microscale diffusion coefficient,  $\sim 5 \times 10^{-3} \mu\text{m}^2/\text{s}$  (39)). Wild-type CFTR was predominantly tethered, whereas mobility was dramatically increased in a mutant that had 10 histidine residues added to the C-terminus to inhibit binding by NHERF and other PDZ-domain proteins. The 10-His mutant displayed transient confinement suggestive of residual protein-protein interactions. Near immobilization of wild-type CFTR was confirmed using CFTR that was labeled with antibody-coated quantum dots, although transient confinement was not detected when NHERF binding was disrupted (18). Finally, a study with antibodies conjugated to colloidal gold revealed transient confinement of wild-type CFTR, which was reduced by mutation of a filamin binding site near the amino terminus (40). None of these studies reported an association of CFTR with lipid rafts.

SPT yields precise information regarding molecular trajectories but requires dilute (usually exofacial) labeling with bright fluorophores so that single molecules can be resolved (41). The kICS analysis used here is more suited for studying populations because it is an ensemble method that can be applied to fluorescently-tagged proteins anywhere in the cell and over a wide range of expression levels (42). Ensemble averaging of kICS data allows separate analysis of the micro- and macroscale dynamics and the resulting  $D_{\text{macro}}$ ,  $D_{\text{micro}}$ , and domain radii are limited only by the background noise and the spatial and temporal resolution of the image time series. Multicomponent fitting of the kICS correlation function provides average results for large numbers of cells, facilitating statistical comparisons over very different time- and lengthscales. The kICS analysis described here provides the first evidence, to our knowledge, that cholesterol influences CFTR mobility and confinement. Our estimate of the microscale diffusion coefficient  $6\text{--}10 \times 10^{-3} \mu\text{m}^2/\text{s}$  is well within the range of confined dynamics reported previously; thus, CFTR partitioning in the plasma membrane likely involves interactions with both cytoskeletal elements and lipid rafts.

### CFTR confinement and dynamics are influenced by cholesterol

Approximately 25% of the CFTR in the plasma membrane of primary HBE cells was confined under unstimulated (control) conditions, consistent with localization in lipid rafts. The confined population was reduced by 20% after cells were exposed to COase, but it was not eliminated. COase is a relatively mild treatment and is expected to cause only partial depletion of membrane cholesterol, so 20% is likely an underestimate of the fraction confined to membrane microdomains. More complete extraction of cholesterol would be expected with M $\beta$ CD, but preliminary experiments have revealed that M $\beta$ CD causes cell damage during long-term imaging experiments. The modest decrease in confined CFTR molecules may reflect the fraction that is in cholesterol-

sphingomyelin rafts, with the other 80% being confined by ceramide-based rafts or attachments to the actin cytoskeleton. Elevating cholesterol with cholesterol esterase caused the fraction of CFTR displaying confinement to double. Since cholesterol is a major component of lipid rafts, promoting its insertion into the plasma membrane may increase lipid raft density and/or viscosity. Taken together, the opposing effects of depleting and elevating cholesterol levels provide further evidence for CFTR partitioning into cholesterol-rich membrane microdomains.

Fluorescence-recovery-after-photobleaching studies indicate that 40–50% of the CFTR on IB3-1 and BHK cells has very slow dynamics and does not recover in the photobleached region (15,39). Similar results were obtained using temporal image correlation spectroscopy analysis (39). The contribution of cholesterol-rich microdomains to CFTR dynamics was not examined, but more recent studies have detected 6–48% of the total CFTR from Calu-3 cells in a DRM fraction (4,8).

The results presented here indicate that the lateral mobility of a CFTR population is cholesterol dependent, consistent with confinement in cholesterol-rich microdomains (lipid rafts). Cholesterol depletion significantly increased  $D_{\text{micro}}$ , suggesting that they were weaker traps.  $D_{\text{macro}}$  increased as well since large spatial scale dynamics are also influenced by transient confinements. Reduced trapping was also evident as an increase in the  $R$ -value, indicating a decrease in the confinement strength. On the other hand, enhancing cholesterol insertion with CEase dramatically reduced  $D_{\text{micro}}$ , probably through enhanced sphingomyelin packing, which increased order within the microdomains. Trapping was expected to reduce  $D_{\text{micro}}$ ,  $D_{\text{macro}}$ , and the  $R$ -value, and this was observed. To our knowledge, these results present the first biophysical quantification of CFTR partitioning into cholesterol-rich microdomains in the plasma membrane of live cells.

kICS analysis together with the spatial ICS analysis showed that elevating membrane cholesterol reduces the CFTR CD by twofold, increases the DA by threefold, dramatically increases the fraction of CFTR molecules displaying microscale dynamics,  $f_{\text{micro}}$ , increases CFTR confinement strength (i.e.,  $R$ -value), and reduces small-spatial-scale dynamics,  $D_{\text{micro}}$ . The decline in CFTR CD suggests a decrease in the density of lipid rafts after cholesterol insertion, perhaps due to formation of larger lipid rafts or the fusion of microdomains as shown in Fig. 3 c. The increase in DA and  $f_{\text{micro}}$  and the decrease in  $D_{\text{micro}}$  suggest that lipid raft viscosity and CFTR confinement are increased after cholesterol insertion, probably due to enhanced sphingomyelin packing.

### CFTR platforms after viral infection

CFTR is central to innate immunity in the airways through its roles in mucociliary clearance, bicarbonate-dependent bacterial killing, and perhaps direct binding and internalization of bacteria (14–16,37,43). Exposing airway epithelial



cells to *Pseudomonas aeruginosa* causes lipid rafts to fuse into large ceramide-rich platforms, which leads to internalization of the bacterium, apoptosis and cytokine release (34). Infection by some viruses is also enhanced by the hydrolysis of membrane sphingomyelin to ceramide (35,36). We found that acute exposure to adenovirus particles had rapid effects on CFTR mobility. Within 30 min, CFTR dynamics decreased >80% with a pronounced shift of unconfined CFTR to the confined population, consistent with fusion of nanoscale lipid rafts containing CFTR clusters into much larger platforms 1–2  $\mu\text{m}$  in diameter (Fig. 3 d). These acute effects resemble those described previously during *Pseudomonas aeruginosa* infection (34). The platforms were transient; they were not observed 4 days postinfection under control conditions, further evidence that cells had recovered from any interferon or inflammatory responses to the adenoviral vector delivery of CFTR.

## CONCLUSIONS

To our knowledge, these studies provide the first biophysical evidence that CFTR exists in two populations at the cell surface, one of which is influenced by cholesterol. Since cholesterol is an important constituent of lipid rafts, this strongly suggests that one of the CFTR populations is situated in lipid rafts under unstimulated conditions. Clustering and confinement in lipid rafts may modulate CFTR channel function as the membrane microdomains are known to recruit kinases and other signaling molecules that regulate CFTR. NHERF1, a scaffold protein that tethers CFTR to the actin cytoskeleton and stabilizes it in the plasma membrane, is especially interesting in this regard as it has a cholesterol binding motif (13). Whether this motif helps target NHERF1 and its interactome to rafts remains to be determined. The incorporation of CFTR into large ceramide-rich platforms through the fusion of lipid rafts may be a mechanism by which CFTR expression and channel function are elevated at the cell surface.

## SUPPORTING MATERIAL

Supporting Materials and Methods, Supporting Results, seven figures, and one table are available at [http://www.biophysj.org/biophysj/supplemental/S0006-3495\(15\)00550-0](http://www.biophysj.org/biophysj/supplemental/S0006-3495(15)00550-0).

## AUTHOR CONTRIBUTIONS

A.A.A. designed and performed research, provided analysis codes, analyzed data, and wrote the article. E.P. provided analysis codes and analyzed data. J.G. and E.M. provided primary HBE cells. J.W.H. and P.W.W. designed the research and wrote the article.

## ACKNOWLEDGMENTS

We thank Dr. Claire Brown and the Advanced BioImaging Facility staff of the McGill Life Sciences Complex for providing instruments and expertise.

We also thank the staff of CFTRc for providing biological expertise, and the staff of Cystic Fibrosis Canada Primary Airway Cell Bank at McGill University for providing primary airway epithelial cells. Tissues for HBE cell isolation were from the Biobank of respiratory tissues of the Centre Hospitalier de l'Université de Montréal and Institut de recherche cliniques de Montréal of the Respiratory Health Network of Fonds de Recherche du Québec-Santé. We are also grateful to Drs. Pierre LeSimple, Jie Liao, and Gopakumar Gopalakrishnan for technical help.

A.A.A. received fellowship support from the Natural Sciences and Engineering Research Council of Canada (NSERC), Cystic Fibrosis Canada (CFC), and Groupe de Recherche Axé sur la Structure des Protéines (GRASP). J.W.H. was funded by the Canadian Institutes of Health Research (CIHR) and the Cystic Fibrosis Foundation. P.W.W. acknowledges support from an NSERC Discovery Grant. J.W.H. and P.W.W. are members of the Groupe d'Étude des Protéines Membranaires (GÉPROM).

## SUPPORTING CITATIONS

References (44–47) appear in the [Supporting Material](#).

## REFERENCES

- Guggino, W. B., and B. A. Stanton. 2006. New insights into cystic fibrosis: molecular switches that regulate CFTR. *Nat. Rev. Mol. Cell Biol.* 7:426–436.
- Penmatsa, H., W. Zhang, ..., A. P. Naren. 2010. Compartmentalized cyclic adenosine 3',5'-monophosphate at the plasma membrane clusters PDE3A and cystic fibrosis transmembrane conductance regulator into microdomains. *Mol. Biol. Cell.* 21:1097–1110.
- Frizzell, R. A., and J. W. Hanrahan. 2012. Physiology of epithelial chloride and fluid secretion. *Cold Spring Harb. Perspect. Med.* 2:a009563.
- Wang, D., W. Wang, ..., P. Huang. 2008. Functional coupling of Gs and CFTR is independent of their association with lipid rafts in epithelial cells. *Pflugers Arch.* 456:929–938.
- Calder, P. C., and P. Yaqoob. 2007. Lipid rafts—composition, characterization, and controversies. *J. Nutr.* 137:545–547.
- Simons, K., and D. Toomre. 2000. Lipid rafts and signal transduction. *Nat. Rev. Mol. Cell Biol.* 1:31–39.
- Patel, H. H., F. Murray, and P. A. Insel. 2008. G-protein-coupled receptor-signalling components in membrane raft and caveolae microdomains. *Handb. Exp. Pharmacol.* 2008:167–184.
- Dudez, T., F. Borot, ..., M. Chanson. 2008. CFTR in a lipid raft-TNFR1 complex modulates gap junctional intercellular communication and IL-8 secretion. *Biochim. Biophys. Acta.* 1783:779–788.
- Arcaro, A., M. Aubert, ..., M. J. Seckl. 2007. Critical role for lipid raft-associated Src kinases in activation of PI3K-Akt signalling. *Cell. Signal.* 19:1081–1092.
- Bi, K., Y. Tanaka, ..., A. Altman. 2001. Antigen-induced translocation of PKC- $\theta$  to membrane rafts is required for T cell activation. *Nat. Immunol.* 2:556–563.
- Steinberg, S. F. 2008. Structural basis of protein kinase C isoform function. *Physiol. Rev.* 88:1341–1378.
- Short, D. B., K. W. Trotter, ..., S. L. Milgram. 1998. An apical PDZ protein anchors the cystic fibrosis transmembrane conductance regulator to the cytoskeleton. *J. Biol. Chem.* 273:19797–19801.
- Sheng, R., Y. Chen, ..., W. Cho. 2012. Cholesterol modulates cell signaling and protein networking by specifically interacting with PDZ domain-containing scaffold proteins. *Nat. Commun.* 3:1249.
- Kowalski, M. P., and G. B. Pier. 2004. Localization of cystic fibrosis transmembrane conductance regulator to lipid rafts of epithelial cells is required for *Pseudomonas aeruginosa*-induced cellular activation. *J. Immunol.* 172:418–425.

15. Bajmoczy, M., M. Gadjeva, ..., D. E. Golan. 2009. Cystic fibrosis transmembrane conductance regulator and caveolin-1 regulate epithelial cell internalization of *Pseudomonas aeruginosa*. *Am. J. Physiol. Cell Physiol.* 297:C263–C277.
16. Zaidi, T., M. Bajmoczy, ..., G. B. Pier. 2008. Disruption of CFTR-dependent lipid rafts reduces bacterial levels and corneal disease in a murine model of *Pseudomonas aeruginosa* keratitis. *Invest. Ophthalmol. Vis. Sci.* 49:1000–1009.
17. Vij, N., S. Mazur, and P. L. Zeitlin. 2009. CFTR is a negative regulator of NF $\kappa$ B mediated innate immune response. *PLoS ONE.* 4:e4664.
18. Haggie, P. M., J. K. Kim, ..., A. S. Verkman. 2006. Tracking of quantum dot-labeled CFTR shows near immobilization by C-terminal PDZ interactions. *Mol. Biol. Cell.* 17:4937–4945.
19. Wiseman, P. W., and N. O. Petersen. 1999. Image correlation spectroscopy. II. Optimization for ultrasensitive detection of preexisting platelet-derived growth factor- $\beta$  receptor oligomers on intact cells. *Biophys. J.* 76:963–977.
20. Pandzic, E. 2013. Confinement in image correlation spectroscopy. PhD thesis. McGill University, Montreal, Canada.
21. Kolin, D. L., D. Ronis, and P. W. Wiseman. 2006. k-Space image correlation spectroscopy: a method for accurate transport measurements independent of fluorophore photophysics. *Biophys. J.* 91:3061–3075.
22. Fulcher, M. L., S. Gabriel, ..., S. H. Randell. 2005. Well-differentiated human airway epithelial cell cultures. *Methods Mol. Med.* 107:183–206.
23. Vais, H., G. P. Gao, ..., W. W. Reenstra. 2004. Novel adenoviral vectors coding for GFP-tagged wtCFTR and deltaF508-CFTR: characterization of expression and electrophysiological properties in A549 cells. *Pflugers Arch.* 449:278–287.
24. Wiseman, P. W., J. A. Squier, ..., K. R. Wilson. 2000. Two-photon image correlation spectroscopy and image cross-correlation spectroscopy. *J. Microsc.* 200:14–25.
25. Comeau, J. W. D., S. Costantino, and P. W. Wiseman. 2006. A guide to accurate fluorescence microscopy colocalization measurements. *Biophys. J.* 91:4611–4622.
26. Nohe, A., E. Keating, ..., N. O. Petersen. 2006. Dynamics of GPI-anchored proteins on the surface of living cells. *Nanomedicine (Lond. Print).* 2:1–7.
27. Keating, E., A. Nohe, and N. O. Petersen. 2008. Studies of distribution, location and dynamic properties of EGFR on the cell surface measured by image correlation spectroscopy. *Eur. Biophys. J.* 37:469–481.
28. Bradbury, N. A., J. A. Clark, ..., R. J. Bridges. 1999. Characterization of the internalization pathways for the cystic fibrosis transmembrane conductance regulator. *Am. J. Physiol.* 276:L659–L668.
29. Lenne, P. F., L. Wawrezynieck, ..., D. Marguet. 2006. Dynamic molecular confinement in the plasma membrane by microdomains and the cytoskeleton meshwork. *EMBO J.* 25:3245–3256.
30. von Tresckow, B., K. J. Kallen, ..., H. P. Hansen. 2004. Depletion of cellular cholesterol and lipid rafts increases shedding of CD30. *J. Immunol.* 172:4324–4331.
31. Samsonov, A. V., I. Mihalyov, and F. S. Cohen. 2001. Characterization of cholesterol-sphingomyelin domains and their dynamics in bilayer membranes. *Biophys. J.* 81:1486–1500.
32. Nipper, M. E., S. Majd, ..., M. A. Haidekker. 2008. Characterization of changes in the viscosity of lipid membranes with the molecular rotor FCVJ. *Biochim. Biophys. Acta.* 1778:1148–1153.
33. Pralle, A., P. Keller, ..., J. K. H. Hörber. 2000. Sphingolipid-cholesterol rafts diffuse as small entities in the plasma membrane of mammalian cells. *J. Cell Biol.* 148:997–1008.
34. Grassmé, H., V. Jendrossek, ..., E. Gulbins. 2003. Host defense against *Pseudomonas aeruginosa* requires ceramide-rich membrane rafts. *Nat. Med.* 9:322–330.
35. Grassmé, H., A. Riehle, ..., E. Gulbins. 2005. Rhinoviruses infect human epithelial cells via ceramide-enriched membrane platforms. *J. Biol. Chem.* 280:26256–26262.
36. Tani, H., M. Shiokawa, ..., Y. Matsuura. 2010. Involvement of ceramide in the propagation of Japanese encephalitis virus. *J. Virol.* 84:2798–2807.
37. Colasurdo, G. N., J. J. Fullmer, ..., J. M. Stark. 2006. Respiratory syncytial virus infection in a murine model of cystic fibrosis. *J. Med. Virol.* 78:651–658.
38. Saxton, M. J., and K. Jacobson. 1997. Single-particle tracking: applications to membrane dynamics. *Annu. Rev. Biophys. Biomol. Struct.* 26:373–399.
39. Bates, I. R., B. Hébert, ..., J. W. Hanrahan. 2006. Membrane lateral diffusion and capture of CFTR within transient confinement zones. *Biophys. J.* 91:1046–1058.
40. Thelin, W. R., Y. Chen, ..., S. L. Milgram. 2007. Direct interaction with filamins modulates the stability and plasma membrane expression of CFTR. *J. Clin. Invest.* 117:364–374.
41. Clausen, M. P., E. C. Arnsparang, ..., B. C. Lagerholm. 2014. Simultaneous multi-species tracking in live cells with quantum dot conjugates. *PLoS ONE.* 9:e97671.
42. Arnsparang, E. C., J. Schwartzentruber, ..., B. C. Lagerholm. 2013. Bridging the gap between single molecule and ensemble methods for measuring lateral dynamics in the plasma membrane. *PLoS ONE.* 8:e78096.
43. Pezzulo, A. A., X. X. Tang, ..., J. Zabner. 2012. Reduced airway surface pH impairs bacterial killing in the porcine cystic fibrosis lung. *Nature.* 487:109–113.
44. Randell, S. H., L. Walstad, ..., J. R. Yankaskas. 2001. Isolation and culture of airway epithelial cells from chronically infected human lungs. *In Vitro Cell. Dev. Biol. Anim.* 37:480–489.
45. Avery, J., D. J. Ellis, ..., R. Jahn. 2000. A cell-free system for regulated exocytosis in PC12 cells. *J. Cell Biol.* 148:317–324.
46. Santini, F., and J. H. Keen. 1996. Endocytosis of activated receptors and clathrin-coated pit formation: deciphering the chicken or egg relationship. *J. Cell Biol.* 132:1025–1036.
47. Prigozhina, N. L., and C. M. Waterman-Storer. 2006. Decreased polarity and increased random motility in PtK1 epithelial cells correlate with inhibition of endosomal recycling. *J. Cell Sci.* 119:3571–3582.

# Supporting Material: Cholesterol modulates CFTR confinement in the plasma membrane of primary epithelial cells

Asmahan Abu-Arish  
Physics and Physiology,  
McGill University, Montreal, QC

Elvis Pandzic  
Physics,  
McGill University, Montreal, QC

Julie Goepf  
Physiology,  
McGill University, Montreal, QC

Elizabeth Matthes  
Physiology,  
McGill University, Montreal, QC

John W. Hanrahan  
Physiology,  
McGill University, Montreal, QC

Paul W. Wiseman <sup>1</sup>  
Chemistry & Physics,  
McGill University, Montreal, QC

<sup>1</sup>Corresponding author. Address: Physics, McGill University, 3600 Rue University, Montreal, QC H3A2T8, Canada., Tel.: (514)398-5354, Fax: (514)398-8434

## **Supporting Materials and Methods**

### **Isolation and culture of human bronchial epithelial (HBE) primary cells:**

Human lung tissues were obtained from non-CF and CF individuals after lung transplantation with informed consent under a protocol approved by the Institutional Review Board of the Research Ethics Office of McGill University. Isolation and culture of HBE cells were adapted from procedures previously described (1, 2). Briefly, non-CF and CF airway epithelial cells were isolated from bronchial tissue by enzymatic digestion and were cultured in bronchial epithelial growth medium (BEGM; (1)) on Vitrogen-coated plastic flasks (Advanced BioMatrix, San Diego, CA), then trypsinized, counted, and cryopreserved or transferred directly onto Vitrogen-coated glass-bottom FluoroDishes (4.34 cm<sup>2</sup>, World Precision Instruments, Inc. Sarasota, FL) adapted for imaging at a density of  $3 \times 10^5$  cells/dish. Fresh or previously cryopreserved passage 1 (P1) cells were used. The BEGM medium was changed every two days for a total of 4 days. At 80% confluency, cells were ready to be infected with GFP-CFTR containing adeno-virus as detailed in the paper. For the CF HBE cells, the isolation and growth media were supplemented with specific and adapted antibiotics based on a recent patient antibiogram.

### **Preparation of membrane patches:**

The preparation of membrane patches was done according to (3). Briefly, HBE cells expressing GFP-CFTR grown on 35 mm collagen-coated glass-bottom FluoroDishes were sheared by sonication in ice-cold PBS-buffer using a 100 ms ultrasound pulse. This resulted in removal of cell content except for the basal plasma membrane, which remained attached to the glass-bottom of the FluoroDish and is referred to as a membrane patch. After the procedure, membrane patches were rinsed three times and kept at 4°C in PBS until imaging. The patches were imaged at room temperature using an LSM-710 (Zeiss, Germany).

### **Transferrin internalization assay:**

For live cell imaging of fluorescent-transferrin to reveal clathrin-coated pits (CCPs), HBE cells were serum-starved in OptiMEM for 18 hours at 37°C, then treated acutely with 50 µg/mL of Alexa-594 labeled transferrin (Molecular Probes) for

30 min at 37°C. The cells were then rinsed, mounted in transferrin-free Opti-MEM medium and transferred to the microscope where they were kept at 37°C to monitor transferrin receptor accumulation in CCPs. Samples were imaged using the 488 nm and 561 nm laser lines simultaneously for fluorescence colocalization studies.

### Cell fixation:

HBE cells were rinsed twice in 37°C PBS, then incubated with neutral buffered formalin (10%) (Harleco) for 1 hour at room temperature and maintained at 4°C overnight. The next morning, the cells were rinsed twice for 5 min with cold PBS and stored in PBS at 4°C until imaged. Cells were imaged at 37°C to maintain similar imaging conditions for comparison with live cells results.

### Spatial image cross-correlation spectroscopy (ICCS):

Two-color ICCS was used to assess the colocalized fractions of GFP-CFTR clusters and fluorescent-transferrin-labeled CCPs (4, 5). Colocalization fractions for a region of interest (ROI) were calculated as the ratio of the amplitudes of the spatial cross-correlation and autocorrelation functions determined from CLSM images from the green (g) and red (r) detection channels. The number of colocalized particles (clusters) per beam area was determined as follows:

$$\langle N \rangle_{gr} = \frac{r(0,0)_{gr}}{r(0,0)_{gg}r(0,0)_{rr}} \frac{A_r}{A_g} \quad (1)$$

where  $r(0,0)$  is the zero lags best-fit amplitude of the spatial autocorrelation (gg and rr) or cross-correlation (gr) functions, and  $A_{r/g}$  is the effective area of the focal spot for each laser. The ICCS interaction fraction was defined as the ratio of the number of interacting particles to the total number of fluorescently labeled particles in each detection channel:

$$M_{CFTR} = \frac{r(0,0)_{gr}}{r(0,0)_{gg}} = \frac{\langle N \rangle_{gr}}{\langle N \rangle_{rr}} \quad (2)$$

and,

$$M_{CCP} = \frac{r(0,0)_{gr}}{r(0,0)_{rr}} = \frac{\langle N \rangle_{gr}}{\langle N \rangle_{gg}} \quad (3)$$

where GFP-CFTR was collected in the g channel and CCPs (Alexa-594 transferin) in the r channel. Analysis was performed on a large ROI inside the cells. Spatial ICCS provides information about the colocalization of clusters rather than single molecules for an aggregated system. About 50 cells were analyzed.

## Supporting Results

### GFP-CFTR signal versus autofluorescence:

Fluorescence confocal microscopy images of HBE cells transiently expressing GFP-CFTR on the plasma membrane showed the presence of two different CFTR populations: a population in clusters and a diffuse population in areas outside of clusters. Confocal images of HBE cells expressing GFP-CFTR were compared to images of non-expressing cells (autofluorescence control). Fig. S1 shows a large field of view containing an HBE cell expressing GFP-CFTR (red arrow) next to several other cells that do not express the protein (yellow arrows). It is clear that autofluorescence in cells devoid of GFP-CFTR is negligible compared to the fluorescence generated by the expression of GFP-CFTR.

### Fixed cells analysis:

As a negative control for the kICS analysis, untreated and fixed HBE cells expressing GFP-CFTR were imaged and analyzed in a similar manner to untreated live cells. Protein diffusion is arrested in fixed cells, thus fixation establishes the minimum detection limits for kICS transport measurements and the R value due to mechanical noise arising from random thermal drift of the microscope stage and sample.

Fig. S2 shows the circularly averaged correlation function for GFP-CFTR in live and fixed cells as a function of  $k^2$  at different temporal lags. The correlation functions of GFP-CFTR under live and fixed cell conditions show clear differences in decay rates as expected. The average correlation function of CFTR from the live cells decays as a function of time (from blue to red) indicating protein mobility whereas the correlation function from fixed cells shows no clear decay in time indicative of immobile CFTR. Fig. S3 shows the average micro MSD versus  $\tau$  graph for fixed and live measurements. The slope of the first 3 temporal lags of the micro MSD for the fixed cells is dramatically smaller than the live cells which indicates a significantly smaller  $D_{micro}$  for the fixed cells as expected

due to fixation (table S1). Moreover, a significant difference in the intercept of the  $D_{micro}\tau$  axis at large time lags indicates a much smaller R value for fixed cell measurements (table S1). The smaller R value is indicative of a higher degree of confinement as expected from fixed molecules which are cross-linked.

### Parameter interdependency:

Fig. S4a shows a schematic drawing of a 2D trajectory of an individual CFTR channel undergoing transiently confined dynamics on the plasma membrane of live cells. The black trajectory represents CFTR transport dynamics in the membrane outside of confinements (microdomains, yellow discs), while the red trajectory is the movement of confined CFTR inside the microdomains, which is referred to in this study as micro dynamics. The kICS analysis yields  $D_{micro}$ : the recovered diffusion coefficient inside the confinements. Fig. S4b shows the macroscale trajectory of CFTR in the plasma membrane (blue) which is referred to as the macro scale dynamics of CFTR. The recovered diffusion coefficient by kICS is  $D_{macro}$ .

$D_{macro}$  is affected by several factors as established by simulations (6). To summarize, a decrease in the recovered  $D_{macro}$  can be due to an increase in the viscosity of the membrane, an increase in the density of microdomains, or a decrease in the escape probability of particles from confinements. For systems with populations in kinetic exchange between confinements,  $D_{macro}$  is an effective (not absolute) macro scale diffusion coefficient as it is partially coupled to  $D_{micro}$  depending on the dynamic parameters of confinement and exchange. Simulations (6) show that  $D_{micro}$  is affected by several factors as well, but is independent of  $D_{macro}$ . To summarize, a decrease in  $D_{micro}$  reflects an increase in the viscosity of domains, a decrease in the escape probability of particles from domains, or an increase in domain radii. Overall, an increase in CFTR confinement is expected to decrease both  $D_{macro}$  and  $D_{micro}$ .

### CFTR clusters are on the plasma membrane according to the membrane-patch method:

To determine if CFTR clusters were localized to the plasma membrane or attached to a structure within the cell (such as the actin-cytoskeleton), membrane patches were prepared from HBE cells expressing GFP-CFTR as described in Materials and Methods and immediately imaged (Fig. S5). The imaged CFTR distribu-

tion was similar to that on the basal membrane of live cells for all membrane patches imaged indicating that CFTR clusters are attached to the plasma membrane. To rule out the possibility that these clusters are associated with residual components of the actin-cytoskeleton, samples were fluorescently labeled with phalloidin-Alexa555 to label F-actin. Images of phalloidin labeled membrane patches did not reveal any F-actin on the patches (data not shown). Our results suggest that CFTR clusters are aggregates of CFTR molecules within the plasma membrane, consistent with their ion channel function.

### **CFTR clusters are not clathrin-coated pits:**

It has been previously shown that CFTR is internalized through clathrin-coated pits (CCPs) (7). To test whether CFTR clusters are CCP internalization sites of CFTR, a fluorescent-transferrin internalization assay was performed to fluorescently label CCPs (8, 9), followed by a fluorescent colocalization study between GFP-CFTR clusters and labeled CCPs using Image Cross Correlation Spectroscopy (ICCS) analysis. Live HBE cells expressing GFP-CFTR were treated with a fluorescently labeled transferrin receptor (TfR) ligand (transferrin-Alex594) as detailed in Materials and Methods. Upon binding its receptor, transferrin stimulates the internalization of TfR through CCPs and results in fluorescent labeling of the coated pits. Fluorescently labeled CCPs were homogeneously distributed as shown in Fig. S6 (white arrows). Approximately 20% of the CFTR clusters were colocalized with CCPs according to ICCS analysis suggesting that only a small percentage of CFTR clusters are situated at these sites of endocytosis.



## Supporting References

1. Fulcher, M. L., S. Gabriel, K. A. Burns, J. R. Yankaskas, and S. H. Randell, 2005. Well-Differentiated Human Airway Epithelial Cell Culture. *Methods Mol Med* 107:183–206.
2. Randell, S. H., L. Walstad, U. E. Schwab, B. R. Grubb, and J. R. Yankaskas, 2001. Isolation and Culture of Airway Epithelial Cells from Chronically Infected Human Lungs. *In Vitro Cell Dev Biol Anim* 37:480–489.
3. Avery, J., D. J. Ellis, T. Lang, P. Holroyd, D. Riedel, R. M. Henderson, J. M. Edwardson, and R. Jahn, 2000. A cell-free system for regulated exocytosis in PC12 cells. *J. Cell Biol.* 148:317–324.
4. Comeau, J. W. D., S. Costantino, and P. W. Wiseman, 2006. A Guide to Accurate Fluorescence Microscopy Colocalization Measurements. *Biophys J* 91:4611–4622.
5. Wiseman, P. W., J. A. Squier, M. H. Ellisman, and K. R. Wilson, 2000. Two-Photon Image Correlation Spectroscopy and Image Cross-Correlation Spectroscopy. *J Microsc* 200:14–25.
6. Pandzic, E., 2013. Confinement in Image correlation Spectroscopy. Ph.D. thesis, McGill University, Montreal, Canada.
7. Bradbury, N. A., J. A. Clark, S. C. Watkins, C. C. Widnell, H. S. S. IV, and R. J. Bridges, 1999. Characterization of the internalization pathways for the cystic fibrosis transmembrane conductance regulator. *Am. J. Physiol. Lung Cell Mol. Physiol.* 276:L659–L668.
8. Santini, F., and J. H. Keen, 1996. Endocytosis of Activated Receptors and Clathrin-coated Pit Formation: Deciphering the Chicken or Egg Relationship. *The Journal of Cell Biology* 132:1025–1036.
9. Prigozhina, N. L., and C. M. Waterman-Storer, 2006. Decreased polarity and increased random motility in PtK1 epithelial cells correlate with inhibition of endosomal recycling. *Journal of Cell Science* 119:3571–3582.

## Supporting Tables

Table S 1: CFTR confinement parameters measured using kICS analysis

| Treatment | $D_{micro}(\mu m^2/s)$      | $D_{macro}(\mu m^2/s)$      | R ( $\mu m$ )             | $n_{cell}$ |
|-----------|-----------------------------|-----------------------------|---------------------------|------------|
| Live      | $0.009 \pm 0.001$           | $0.014 \pm 0.003$           | $0.293 \pm 0.005$         | 136        |
| Fixed     | $0.0005 \pm 0.0002^\dagger$ | $0.0010 \pm 0.0003^\dagger$ | $0.236 \pm 0.002^\dagger$ | 151        |

( $\dagger$ ) significantly different than live cells,  $p < 0.001$

## Supporting Figures

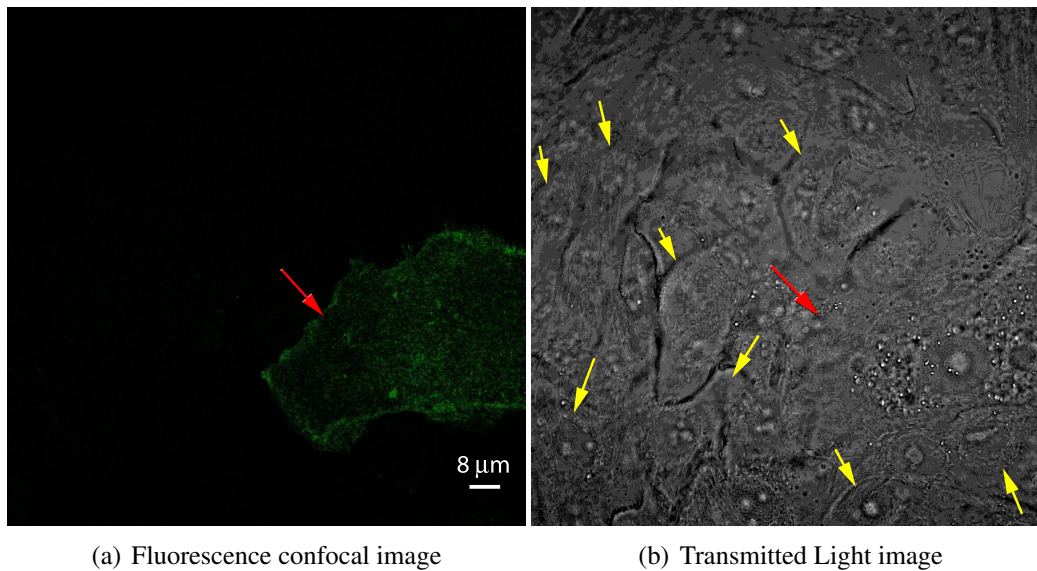

Figure S 1: The fluorescence produced by GFP-CFTR expression is readily distinguished from autofluorescence. (a) Fluorescence confocal image of HBE cells transiently expressing GFP-CFTR (red *arrow*). (b) Transmitted light image of the same region of interest. Comparing cells with (red *arrow*) and without (yellow *arrow*) GFP-CFTR clearly shows that autofluorescence is negligible.

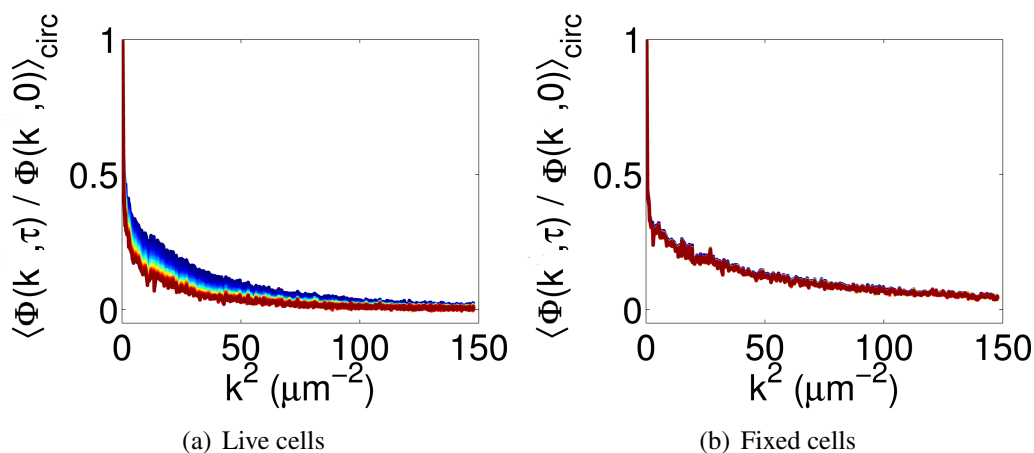

Figure S 2: Control: normalized and circularly-averaged k-space correlation function for GFP-CFTR measured on fixed HBE cells establishes the transport parameter detection limit for this optical system. (a) The average correlation function for GFP-CFTR measured on live cells as a function of the spatial frequency ( $k^2$ ), for different temporal lags. The average spatial correlation function decays as a function of  $\tau$  (blue to red) due to CFTR mobility in the membrane. The presence of at least two dynamically distinct populations is evident in both the early (blue) and the late (red) temporal lag spatial correlations. (b) The average correlation function for GFP-CFTR from fixed cells as a function of  $k^2$  for different time lags. No decay in the spatial correlation function in time is observed indicative of CFTR immobility due to cell fixation. See also Supporting Table 1.

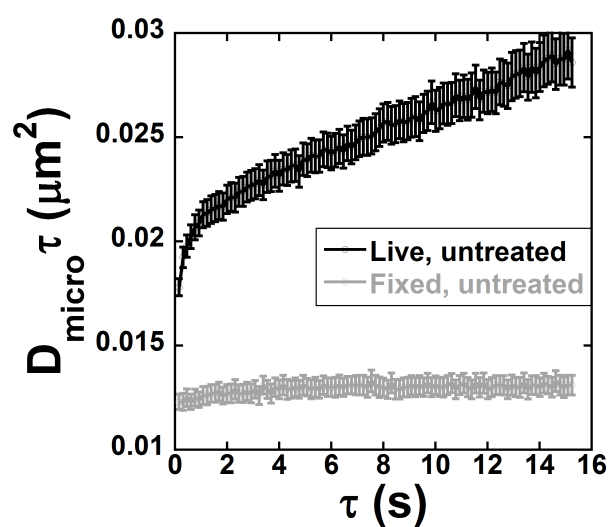

Figure S 3: CFTR micro dynamics on the plasma membrane of live and fixed HBE cells. The average micro scale MSD,  $D_{\text{micro}} \tau$ , of CFTR increased linearly as a function of  $\tau$  for the first few temporal lags in live cells (black) due to CFTR mobility. No significant increase in the MSD for fixed cells was observed (gray) indicative of immobile CFTR as expected. Error bars are SEM.

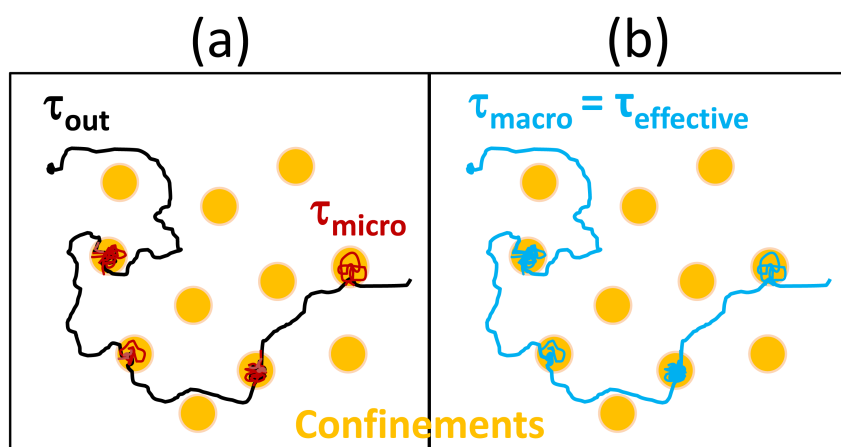

Figure S 4: A schematic drawing of the measured transport dynamics parameters probed via kICS. (a) A 2D trajectory of an individual CFTR channel on the plasma membrane of live cells. The black trajectory describes CFTR transport dynamics outside of confinements (yellow discs), while the red trajectory is the movement of confined CFTR inside the microdomains, that we term micro dynamics. The recovered diffusion coefficient inside the confinements is  $D_{micro}$ . (b) The macroscale trajectory of CFTR in the plasma membrane (blue) that we term macro, but it is also coupled via particle exchange to the micro scale dynamics. The recovered diffusion coefficient by kICS is  $D_{macro}$ .

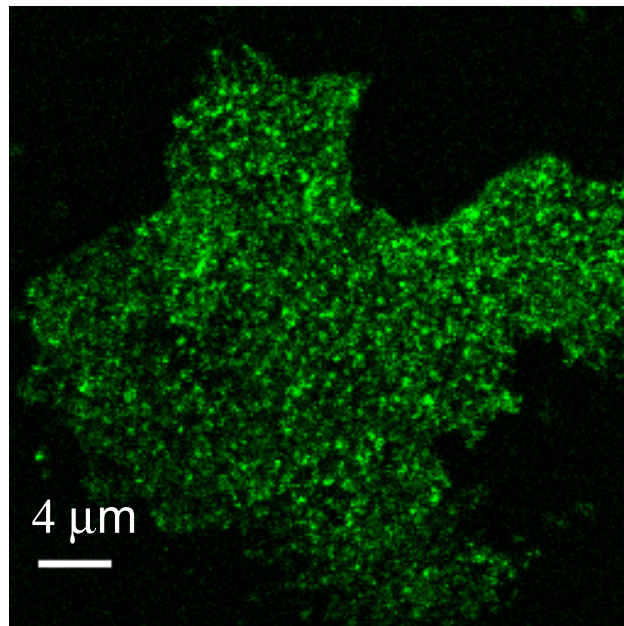

Figure S 5: GFP-CFTR distribution on a plasma membrane patch is similar to that on the basal membrane of live cells. The clear presence of CFTR clusters suggests their insertion in the plasma membrane.

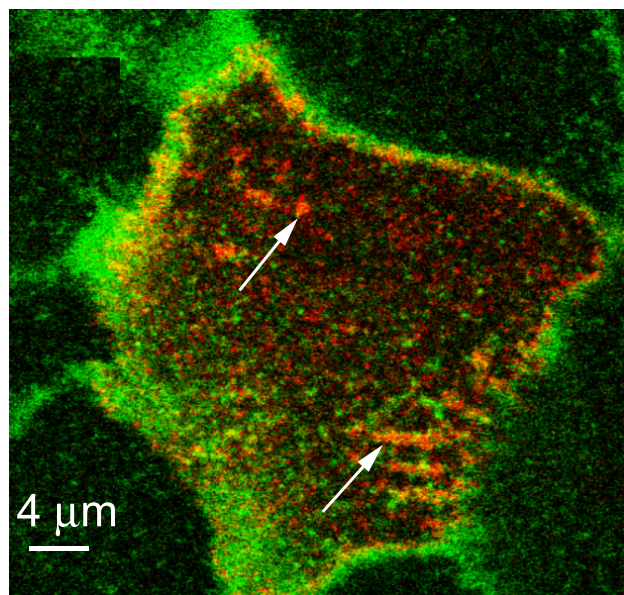

Figure S 6: The majority of CFTR clusters are not situated at CCPs and therefore are not undergoing clathrin mediated endocytosis. ICCS analysis revealed that only 20% of CFTR clusters (green) spatially colocalize with CCP internalization sites (red) while the majority of the clusters do not overlap with the labeled CCP sites. White arrows mark examples of colocalization sites.



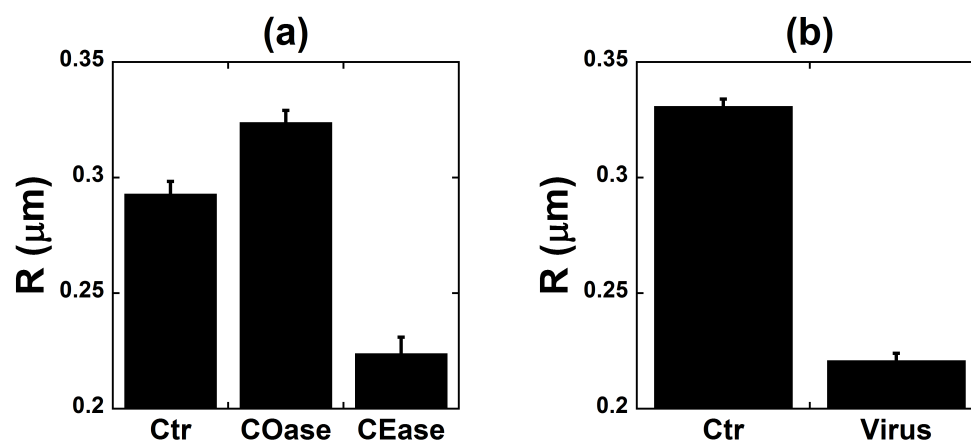

Figure S 7: CFTR confinement strength is cholesterol-dependent. (a) Cholesterol loss by COase treatment resulted in a significant increase in the average R value, consistent with an increase in the exchange dynamics of CFTR in and out of confinements. Cholesterol insertion by CEase treatment resulted in a dramatic decrease in the average R value, consistent with an increase in CFTR confinement and tethering. (b) CFTR confinement strength increased immediately after adenovirus infection. The decrease in the average R value after acute infection indicates an increase in CFTR tethering and confinement in the newly-formed platforms. Error bars are SEM.
